# Supplementary material for: Highly selective fluorescent probe for detection and visualization of palladium ions in mixed aqueous media
Source: Royal Society of Chemistry journal article supplement (doi:10.1039/c2ra22869f), 2012-12-04

## Electronic Supplementary Information

### Highly selective fluorescent probe for detection and visualization of palladium ions in mixed aqueous media

Manoj Kumar,\* Naresh Kumar and Vandana Bhalla

*Department of Chemistry, UGC Sponsored Centre for Advanced Studies-1, Guru Nanak Dev University, Amritsar-143005, Punjab, India.*

Email: [mksharmaa@yahoo.co.in](mailto:mksharmaa@yahoo.co.in)

- S2** UV-vis spectra of **1** in the presence of different metal ions.
- S3** Fluorescence spectra of **1** in the presence of different metal ions.
- S4** Competitive fluorescence response of **1** with Pd<sup>2+</sup> ions in the presence of Cys and Hcy.
- S5** Calculations for the detection limit.
- S6** <sup>1</sup>H NMR spectrum of compound **1**(Full Scale).
- S7** <sup>1</sup>H NMR spectrum of compound **1**(Expanded).
- S8** <sup>13</sup>C NMR spectrum of compound **1**.
- S9** Mass spectrum of receptor **1**.

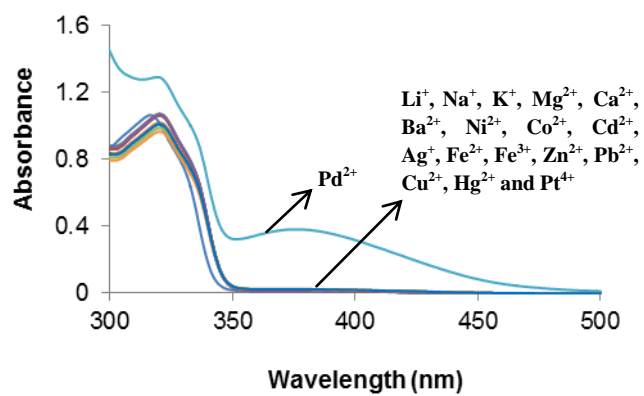

**Figure S1** UV-vis spectra of **1** (5 μM) in H<sub>2</sub>O:CH<sub>3</sub>CN (1:1, v/v) buffered with HEPES, pH = 7.2; in the presence of various metal ions (50 equiv each).

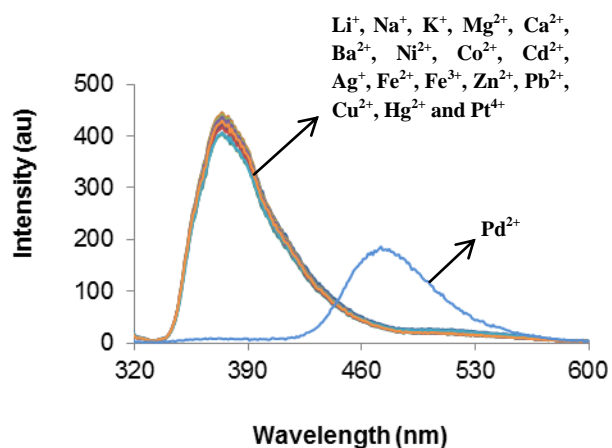

**Figure S2** Fluorescence response of **1** (5  $\mu\text{M}$ ) in  $\text{H}_2\text{O}:\text{CH}_3\text{CN}$  (1:1, v/v) buffered with HEPES, pH = 7.2; at 25  $^\circ\text{C}$ ;  $\lambda_{\text{ex}}$  = 310 nm in the presence different of metal ions (50 equiv each). Data were given after 3 hour with the appropriate metal ions at 25  $^\circ\text{C}$ .

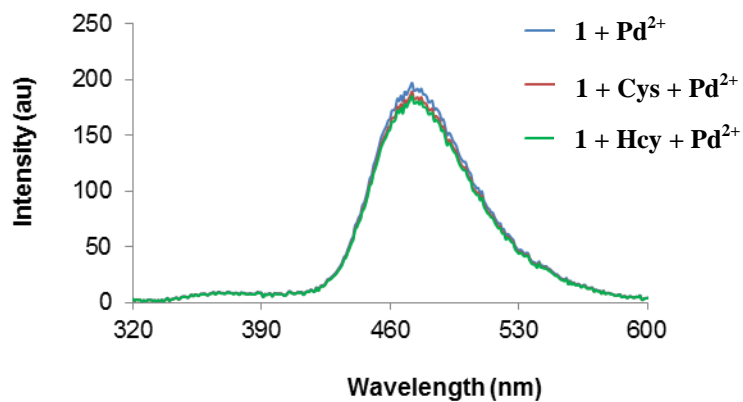

**Figure S3** Fluorescence response of **1** (5  $\mu\text{M}$ ) in  $\text{H}_2\text{O}:\text{CH}_3\text{CN}$  (1:1, v/v) buffered with HEPES, pH = 7.2; at 25  $^\circ\text{C}$ ;  $\lambda_{\text{ex}} = 310$  nm with  $\text{Pd}^{2+}$  ions (50 equiv) in the presence of Cys and Hcy (50 equiv each). Data were given after 3 hour with the appropriate analyte.

### Calculations for detection limit:

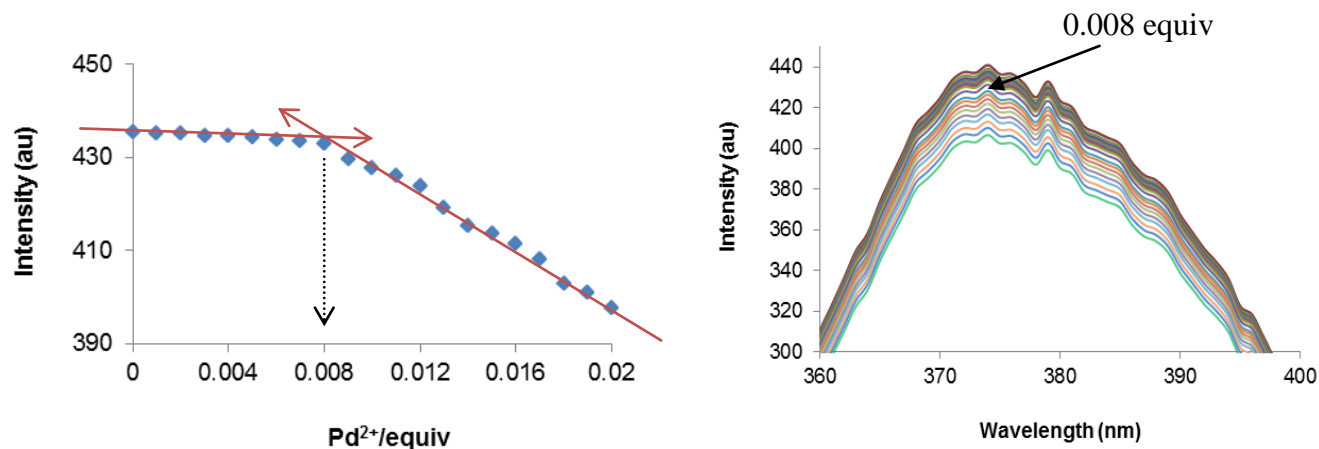

**Figure S5** Figure showing the fluorescence intensity at 372 nm as a function of Pd<sup>2+</sup> ions concentration.

To determine the detection limit,<sup>1</sup> fluorescence titration of compound **1** with palladium ions was carried out by adding aliquots of palladium solution of minimum concentration and the fluorescence intensity as a function of Pd<sup>2+</sup> ions added was then plotted.

#### Equation used for calculating detection limit (DL):

$$DL = C_L \times E_T$$

$C_L$  = Conc. of Ligand;  $E_T$  = Equiv. of Titrant at which change observed.

Thus;

$$DL = 5 \times 10^{-6} \times 0.008 = 0.04 \times 10^{-6} = 4 \times 10^{-8}$$

or

$$= 40 \times 10^{-9} = 40 \text{ nanomolar}$$

<sup>1</sup> G. L. Long and J. D. Winefordner, *Anal. Chem.*, 1983, **55**, 712A.

$^1\text{H}$  NMR ( $\text{CDCl}_3$ , 300 MHz, ppm) spectrum of **1** (Full Scale)

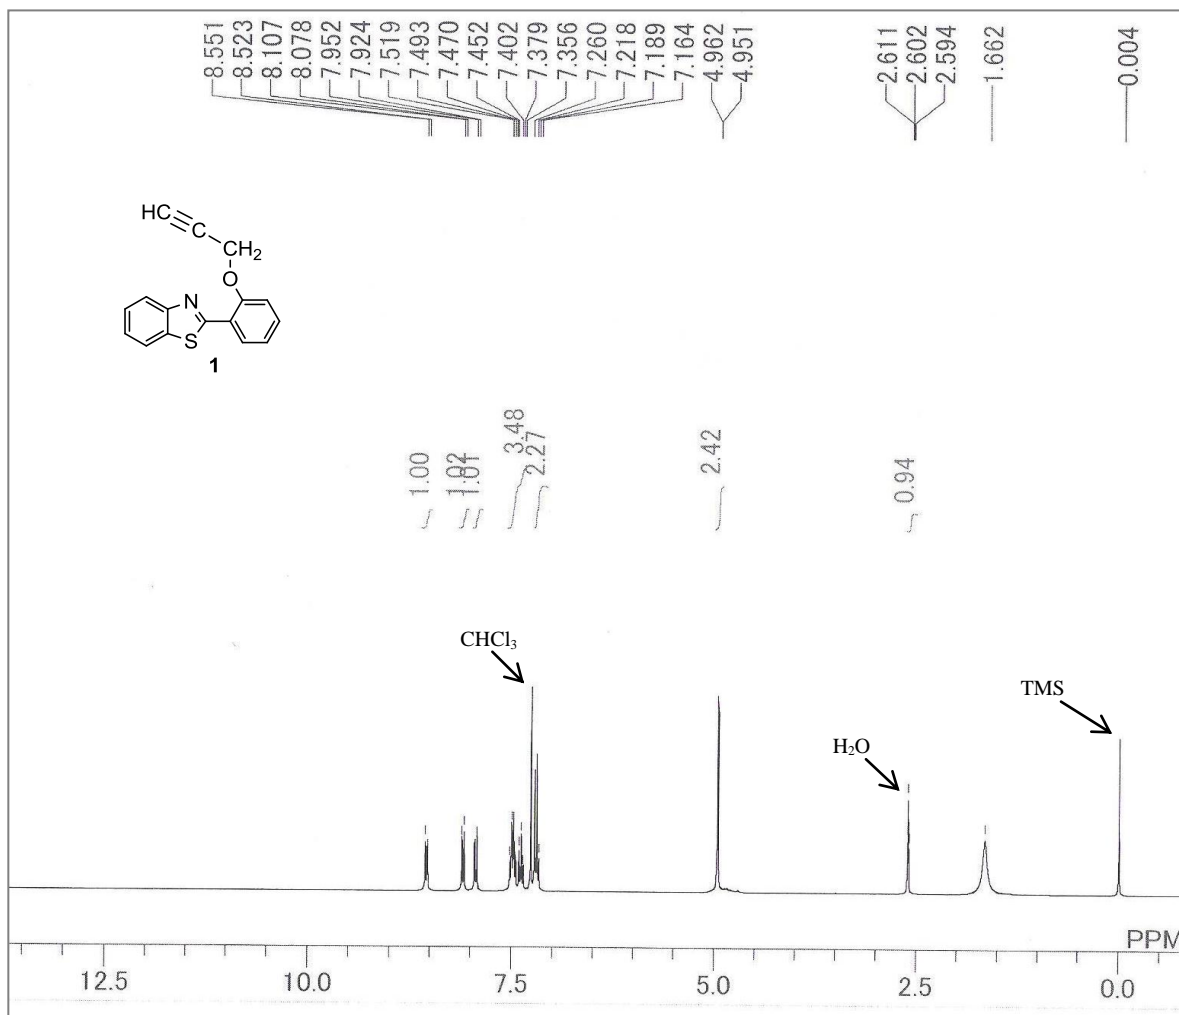

$^1\text{H}$  NMR ( $\text{CDCl}_3$ , 300 MHz, ppm) spectrum of **1** (Expanded)

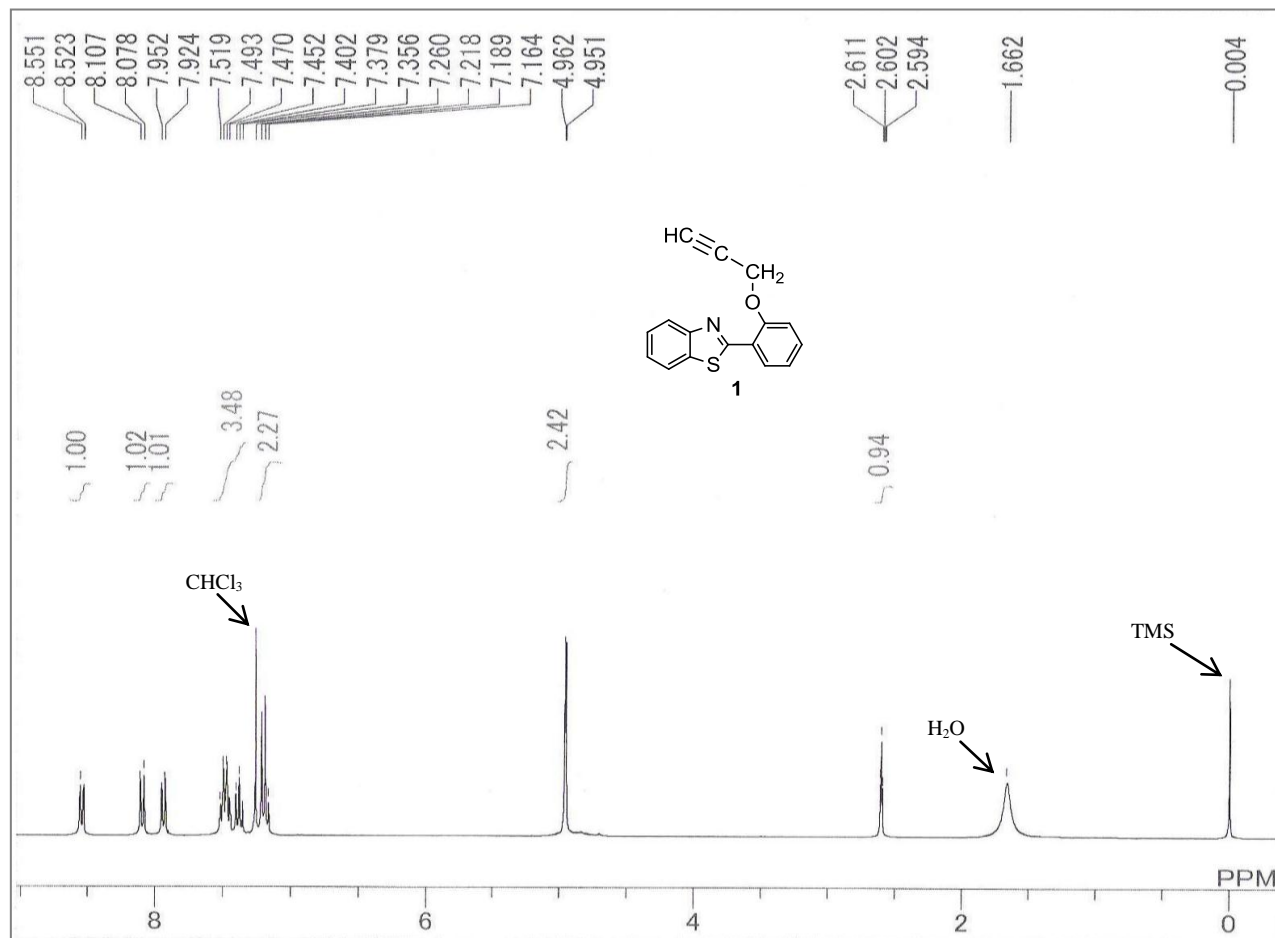

$^{13}\text{C}$  NMR ( $\text{CDCl}_3$ , 300 MHz, ppm) spectrum of **1**

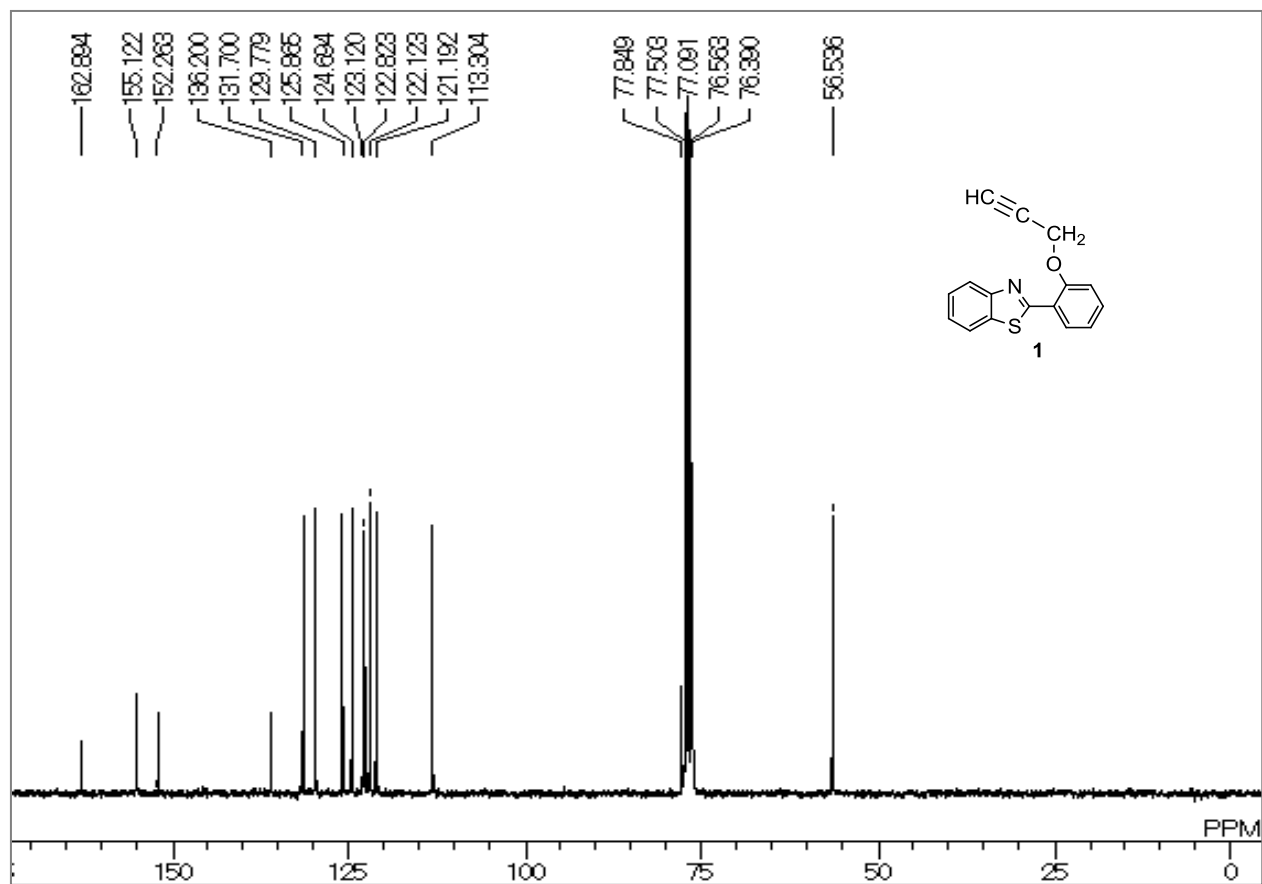



Mass spectrum of **1**

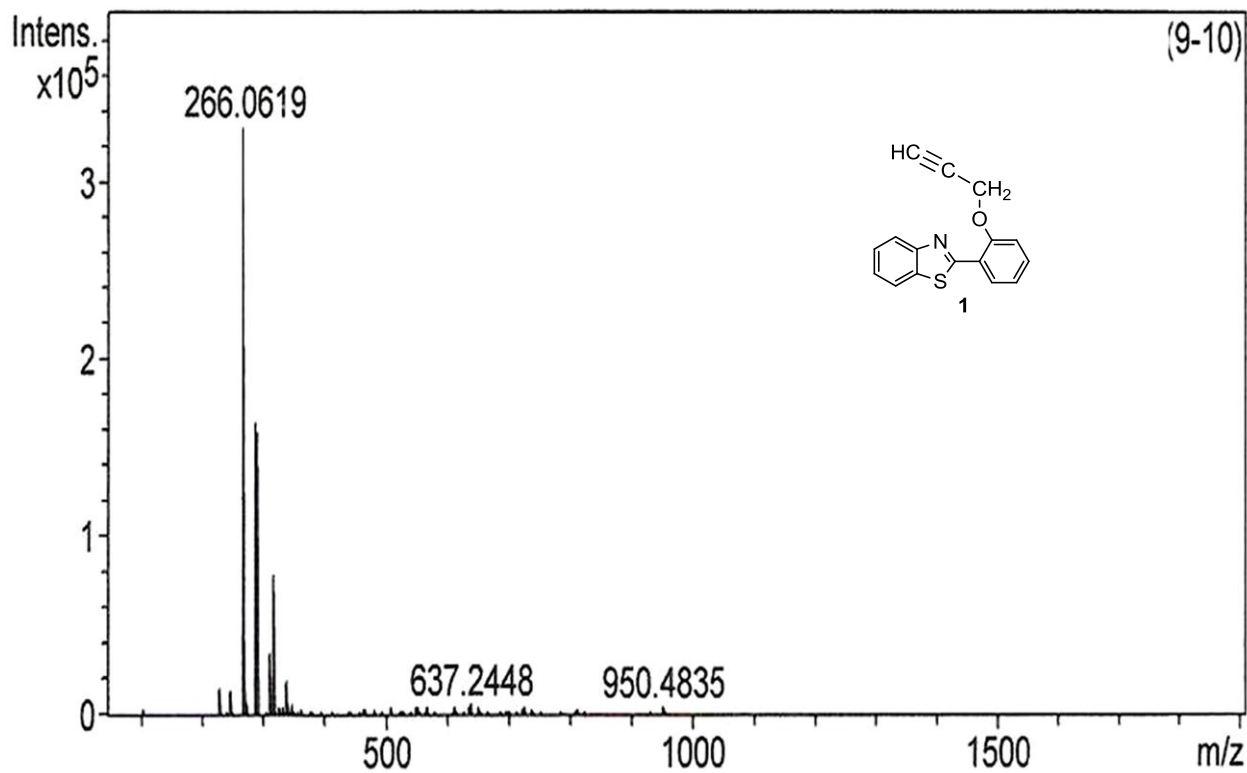

Supplement: c2ra22869f.pdf [file c2ra22869f.pdf]
